# Supplementary material for: Molecular epidemiology and antimicrobial resistance phenotype of paediatric bloodstream infections caused by Gram-negative bacteria
Source: PubMed Central journal article supplement (PMC9372158; doi:10.1038/s43856-022-00161-0), 2022-08-11
Supplement: 43856_2022_161_MOESM3_ESM.pdf [file 43856_2022_161_MOESM3_ESM.pdf]

## Description of Additional Supplementary Files

**File Name:** Supplementary Data 1

**Description:** Microbiological and patient characteristics of patients with Gram-negative bloodstream infections in Oxfordshire stratified by age of onset. P values represent row-wise comparisons using Fisher exact tests for categorical and Kruskal-Wallis tests for continuous variables.
